# Supplementary material for: Torque teno virus from Korean domestic swine farms, 2017–2018
Source: PubMed Central journal article supplement — Vet Med Sci. 2021 May 1;7(5):1854–9. doi: 10.1002/vms3.505 (PMC8464229; doi:10.1002/vms3.505), 2021-05-01
Supplement: VMS3-7-1854-s001.pdf [file VMS3-7-1854-s001.pdf]

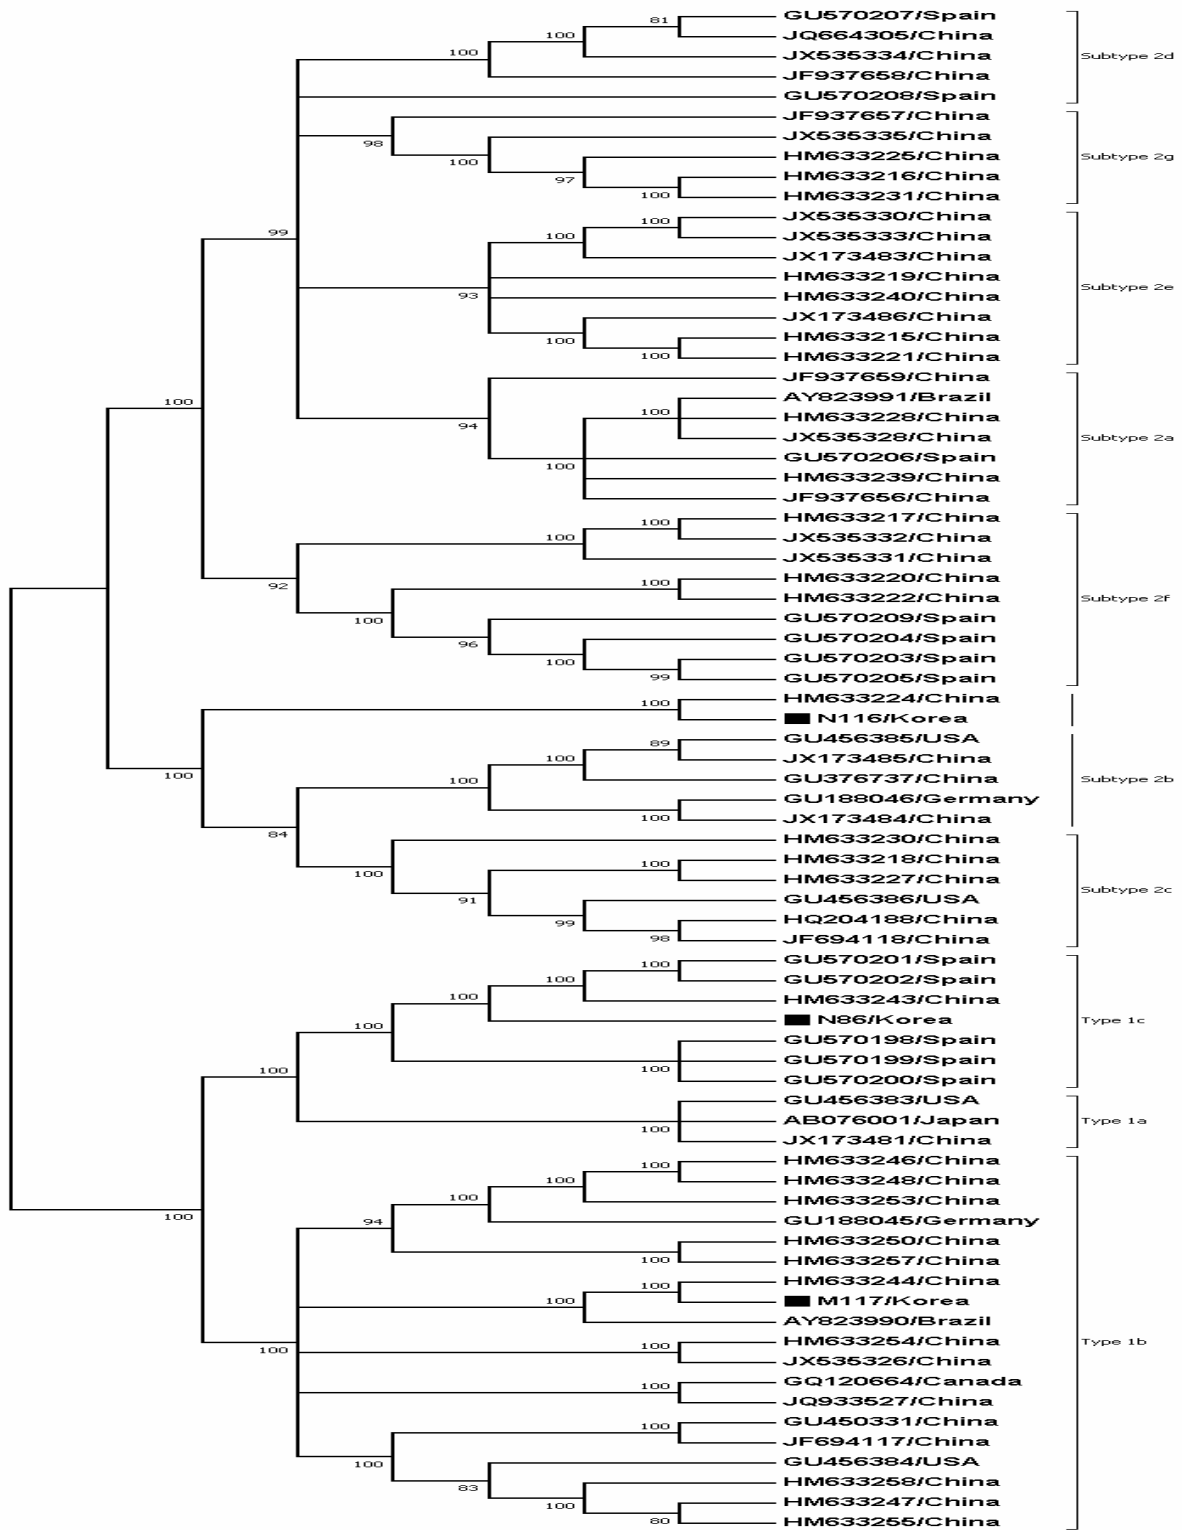

**Supplementary Figure 1.** Phylogenetic tree of genotype TTsuVs. Samples N86, M117 and N116 were clustered to several known TTsuV1 and TTsuV2 sequences (highlighted in square box ■).
